# Supplementary material
Source: PubMed Central journal article supplement (PMC8100789)
Supplement: NIHMS1636977-supplement-1.pdf [file NIHMS1636977-supplement-1.pdf]

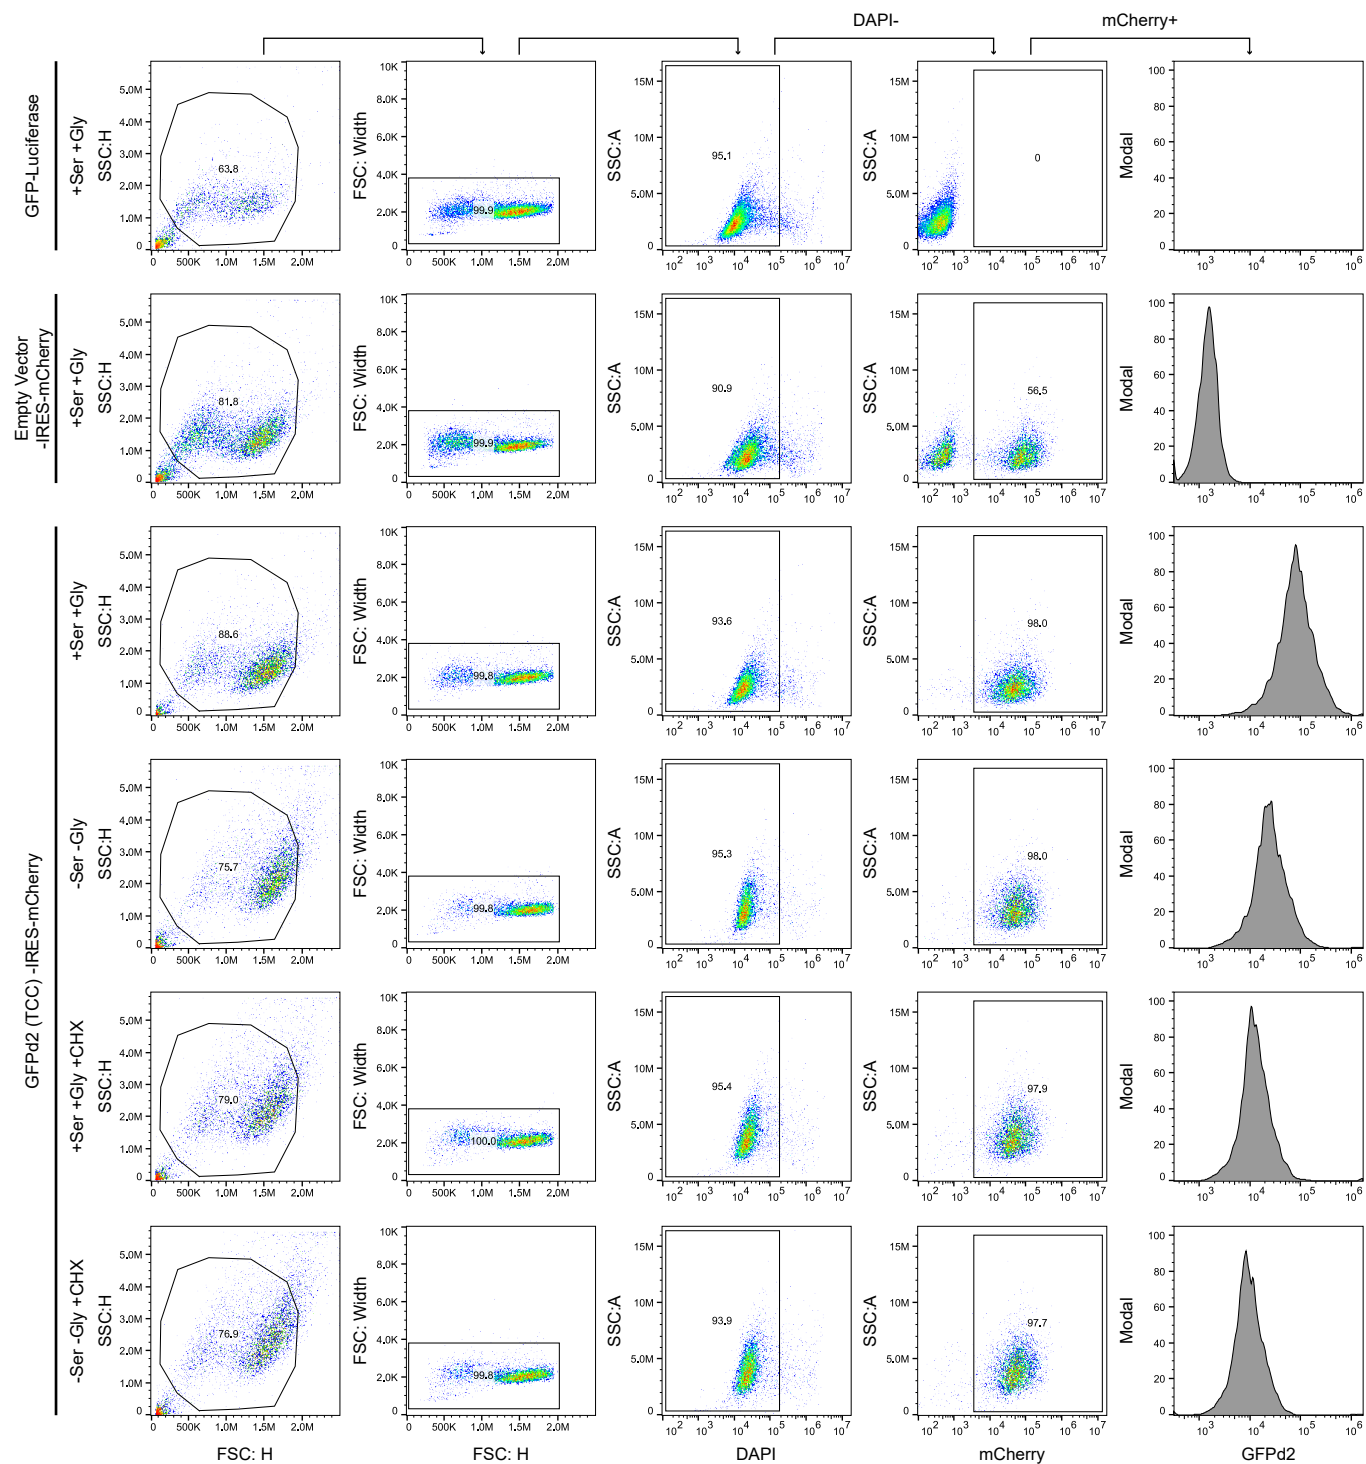

**Methods S1.** Gating strategy used for GFPd2-mCherry flow cytometry analysis. Single cells were gated on FSC:H and SSC:H followed by FSC:W and SSC:H. Live (DAPI-) cells were used to set up gates for mCherry expression. mCherry+ cells were selected to determine the geometric mean of GFP fluorescence.
