# Supplementary material
Source: PubMed Central journal article supplement (PMC8100789)
Supplement: NIHMS1636977-supplement-Supplement_figure_7.pdf [file NIHMS1636977-supplement-Supplement_figure_7.pdf]

■ 0 □ 10nM ■ 50nM ■ 100nM ■ 500nM

exSer-independent

exSer-dependent

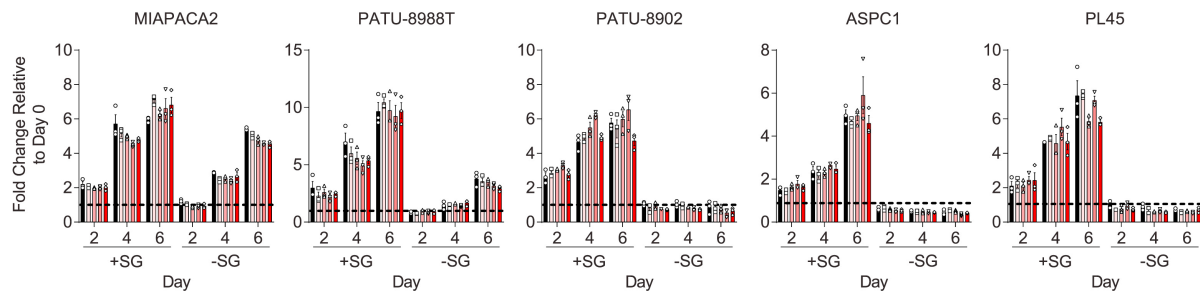

**B**

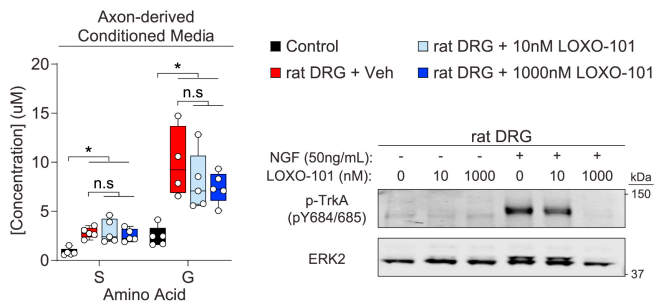

**C**

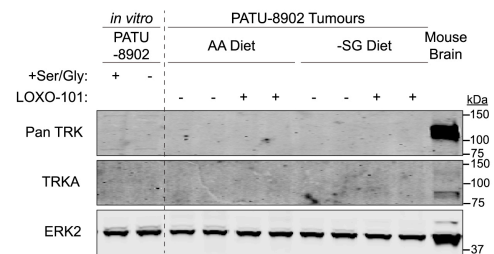

**D**

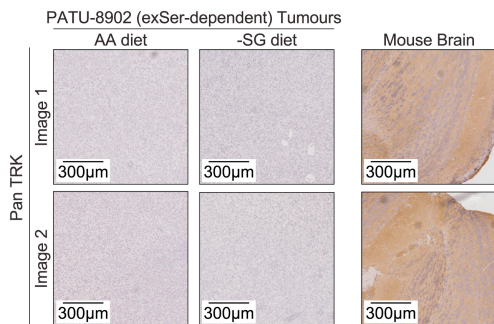

**E**

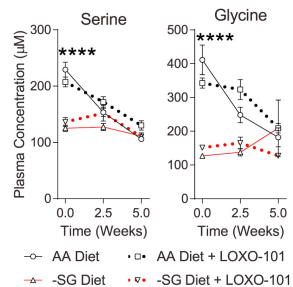

**F**

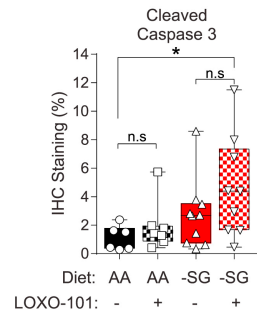

**G**

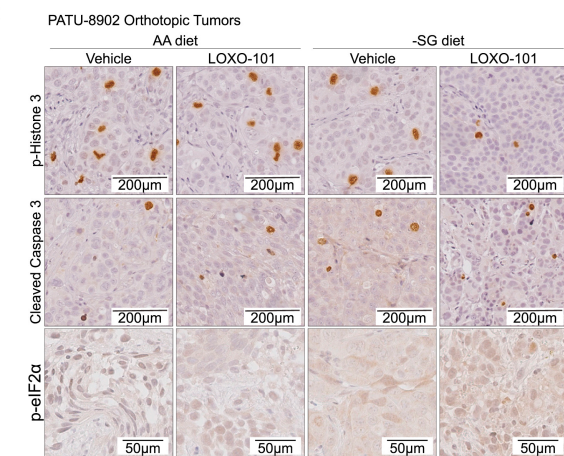

**H**

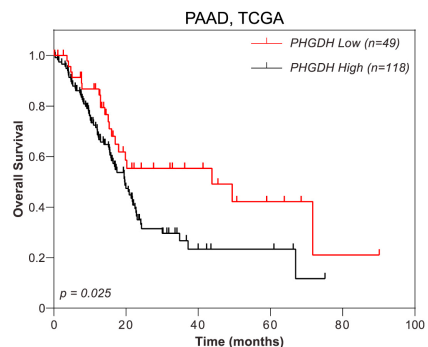

**I**

|              | Differentiation Status |           |            |
|--------------|------------------------|-----------|------------|
|              | Well to Moderate       | Poor      | Total      |
| PHGDH Low    | 83                     | 26        | 109        |
| PHGDH High   | 14                     | 15        | 29         |
| <b>Total</b> | <b>97</b>              | <b>41</b> | <b>138</b> |

$p = 0.004$

**J**

|              | Tumor Size |           | Total      |
|--------------|------------|-----------|------------|
|              | <=2.0 cm   | >2.0 cm   |            |
| PHGDH Low    | 19         | 90        | 109        |
| PHGDH High   | 1          | 28        | 29         |
| <b>Total</b> | <b>97</b>  | <b>41</b> | <b>138</b> |

$p = 0.057$
