# Supplementary material
Source: PubMed Central journal article supplement (PMC8100789)

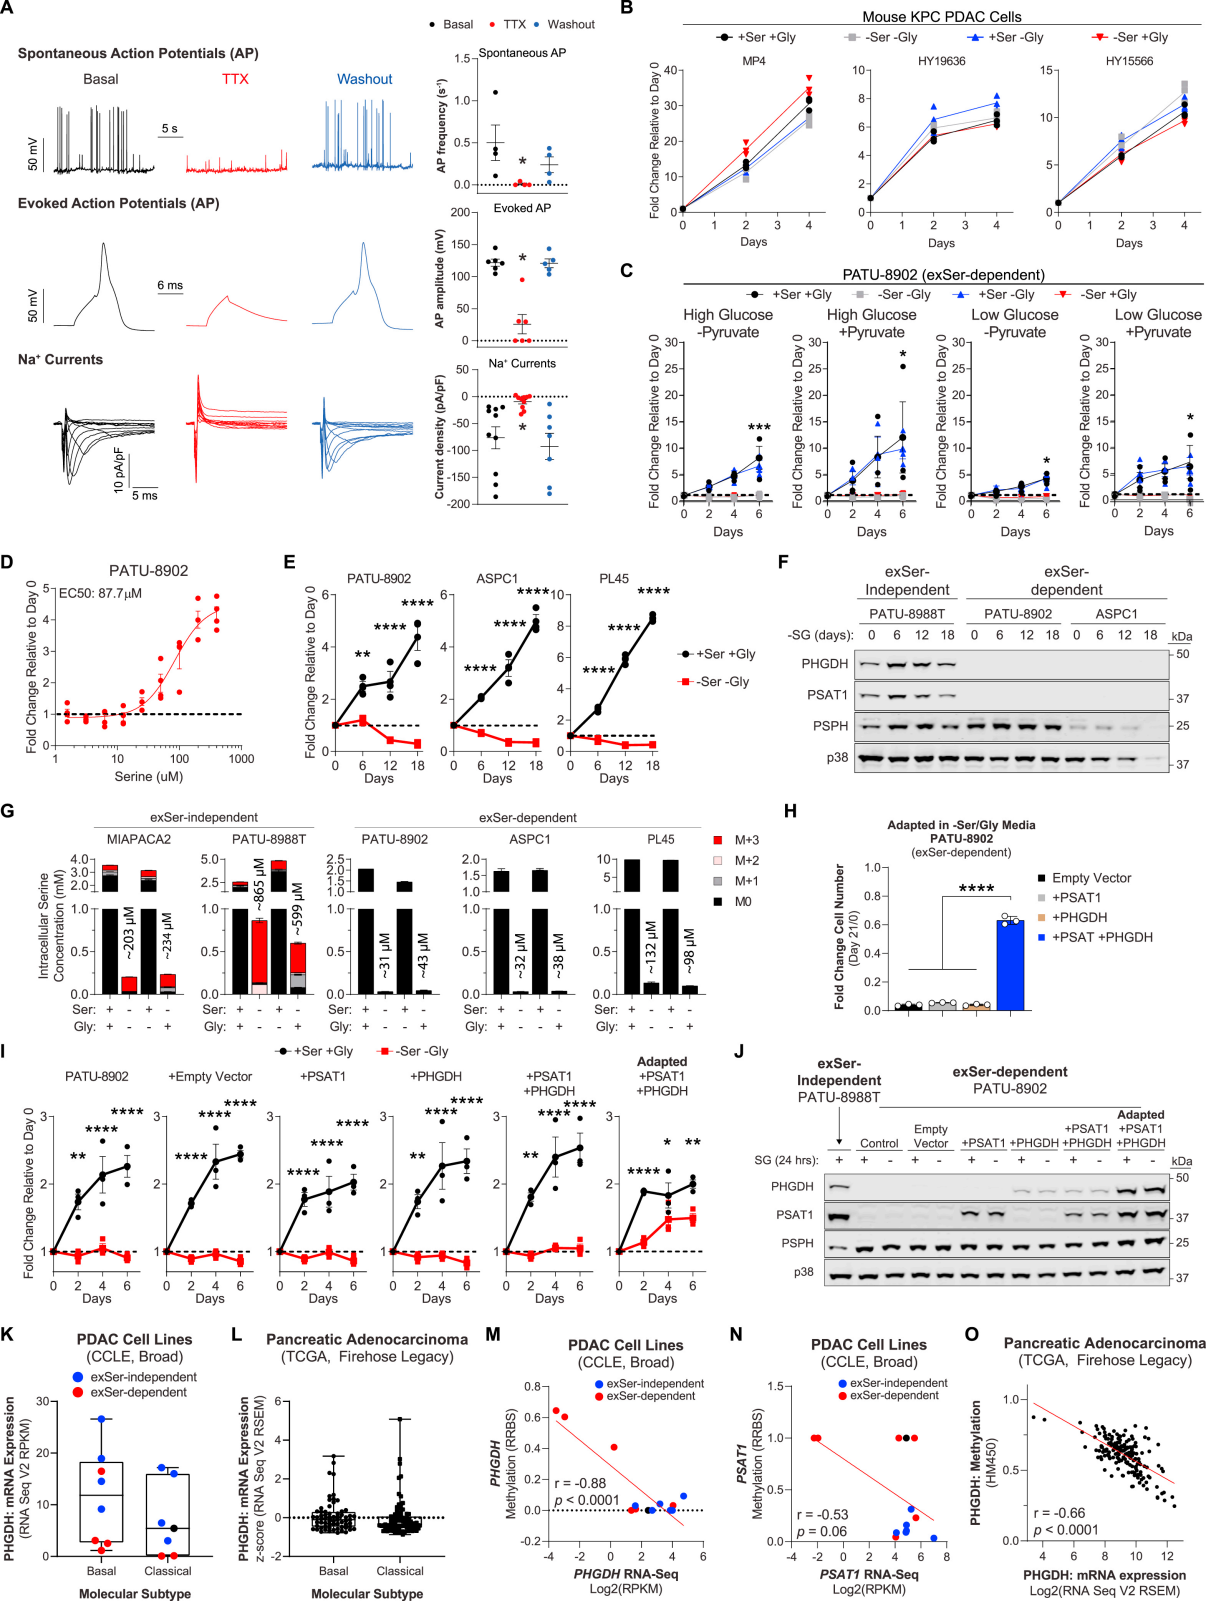

Supplement: NIHMS1636977-supplement-Supplement_figure_1.pdf [file NIHMS1636977-supplement-Supplement_figure_1.pdf]

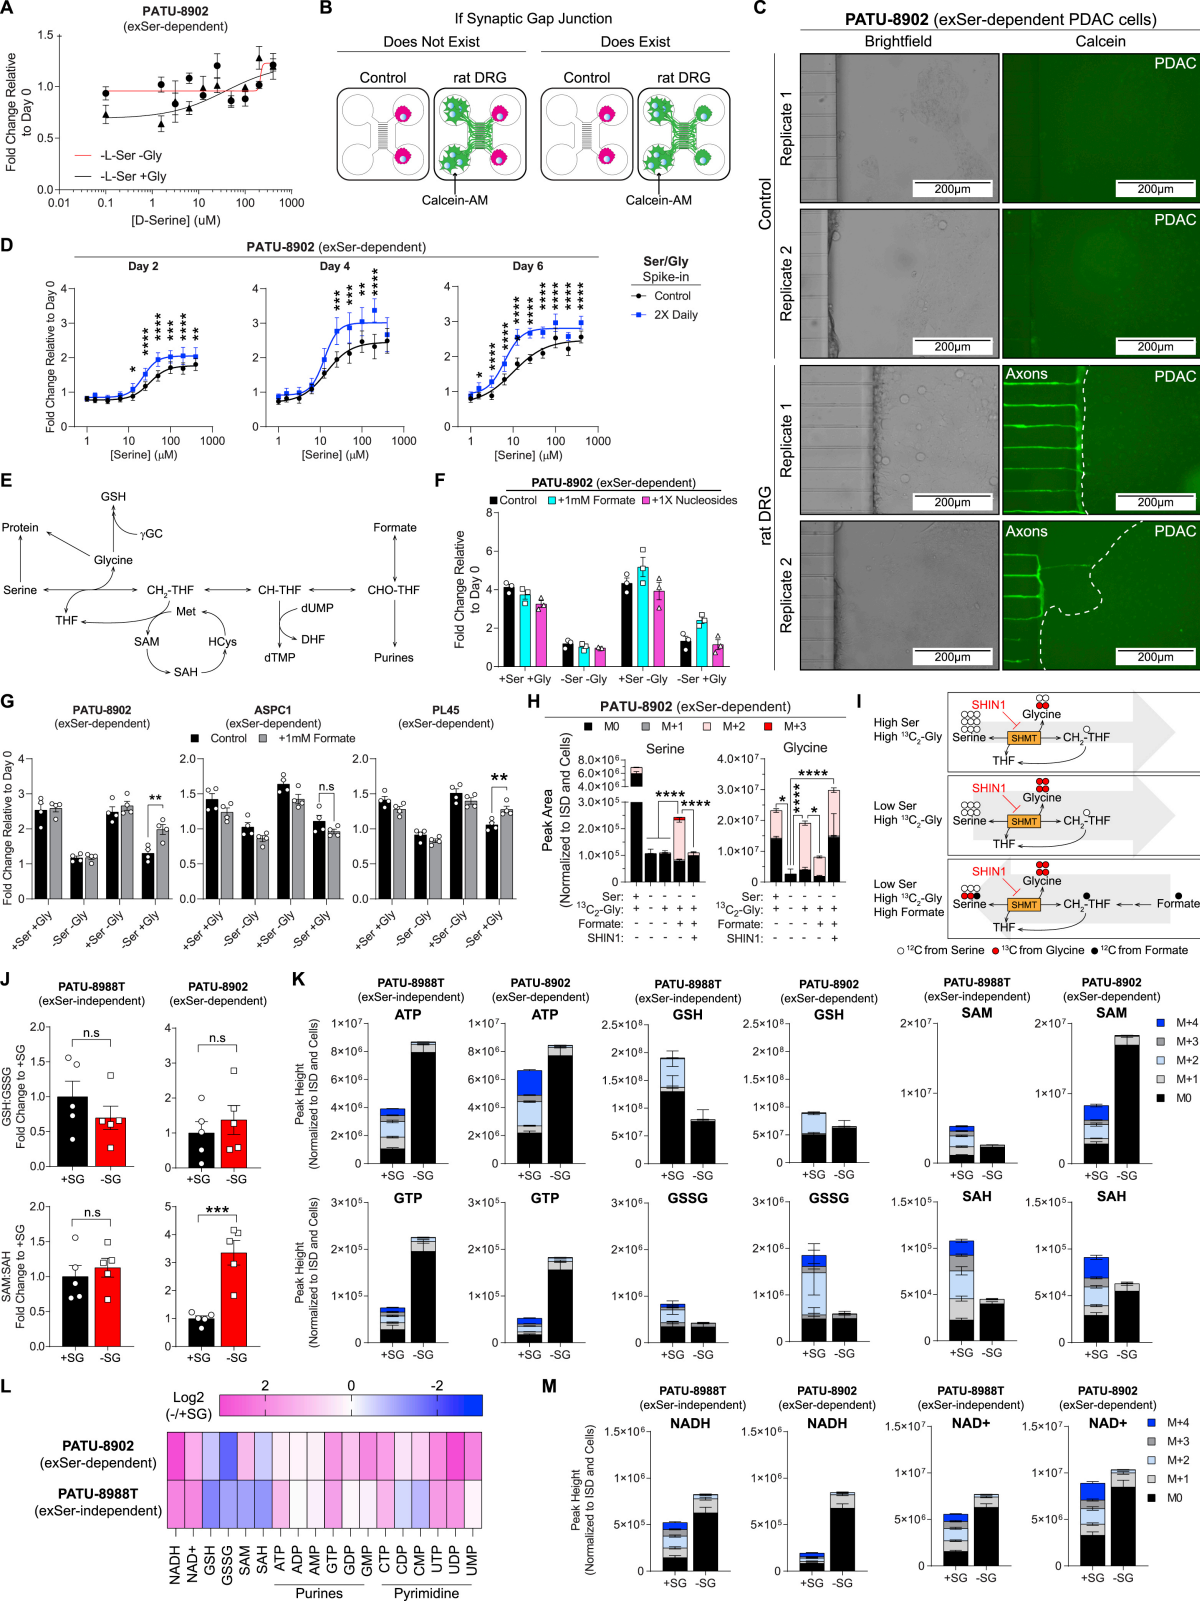

Supplement: NIHMS1636977-supplement-Supplement_figure_2.pdf [file NIHMS1636977-supplement-Supplement_figure_2.pdf]

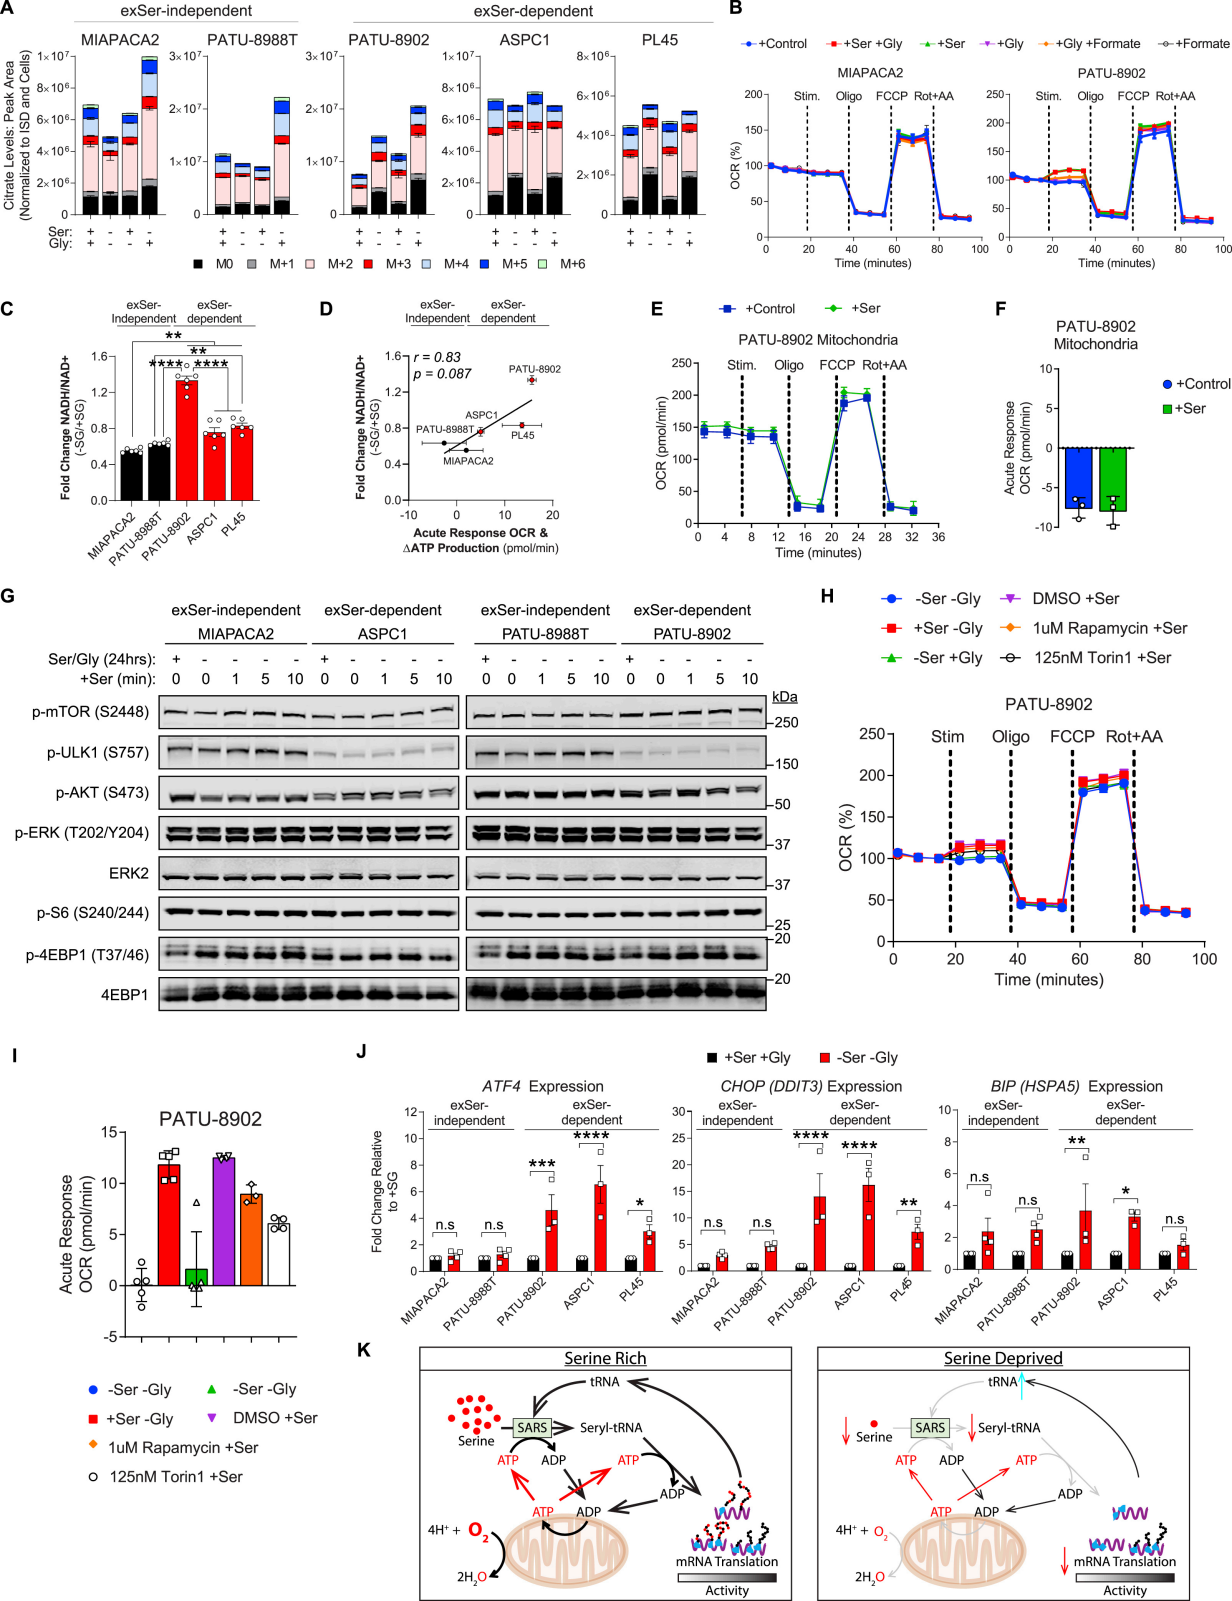

Supplement: NIHMS1636977-supplement-Supplement_figure_3.pdf [file NIHMS1636977-supplement-Supplement_figure_3.pdf]

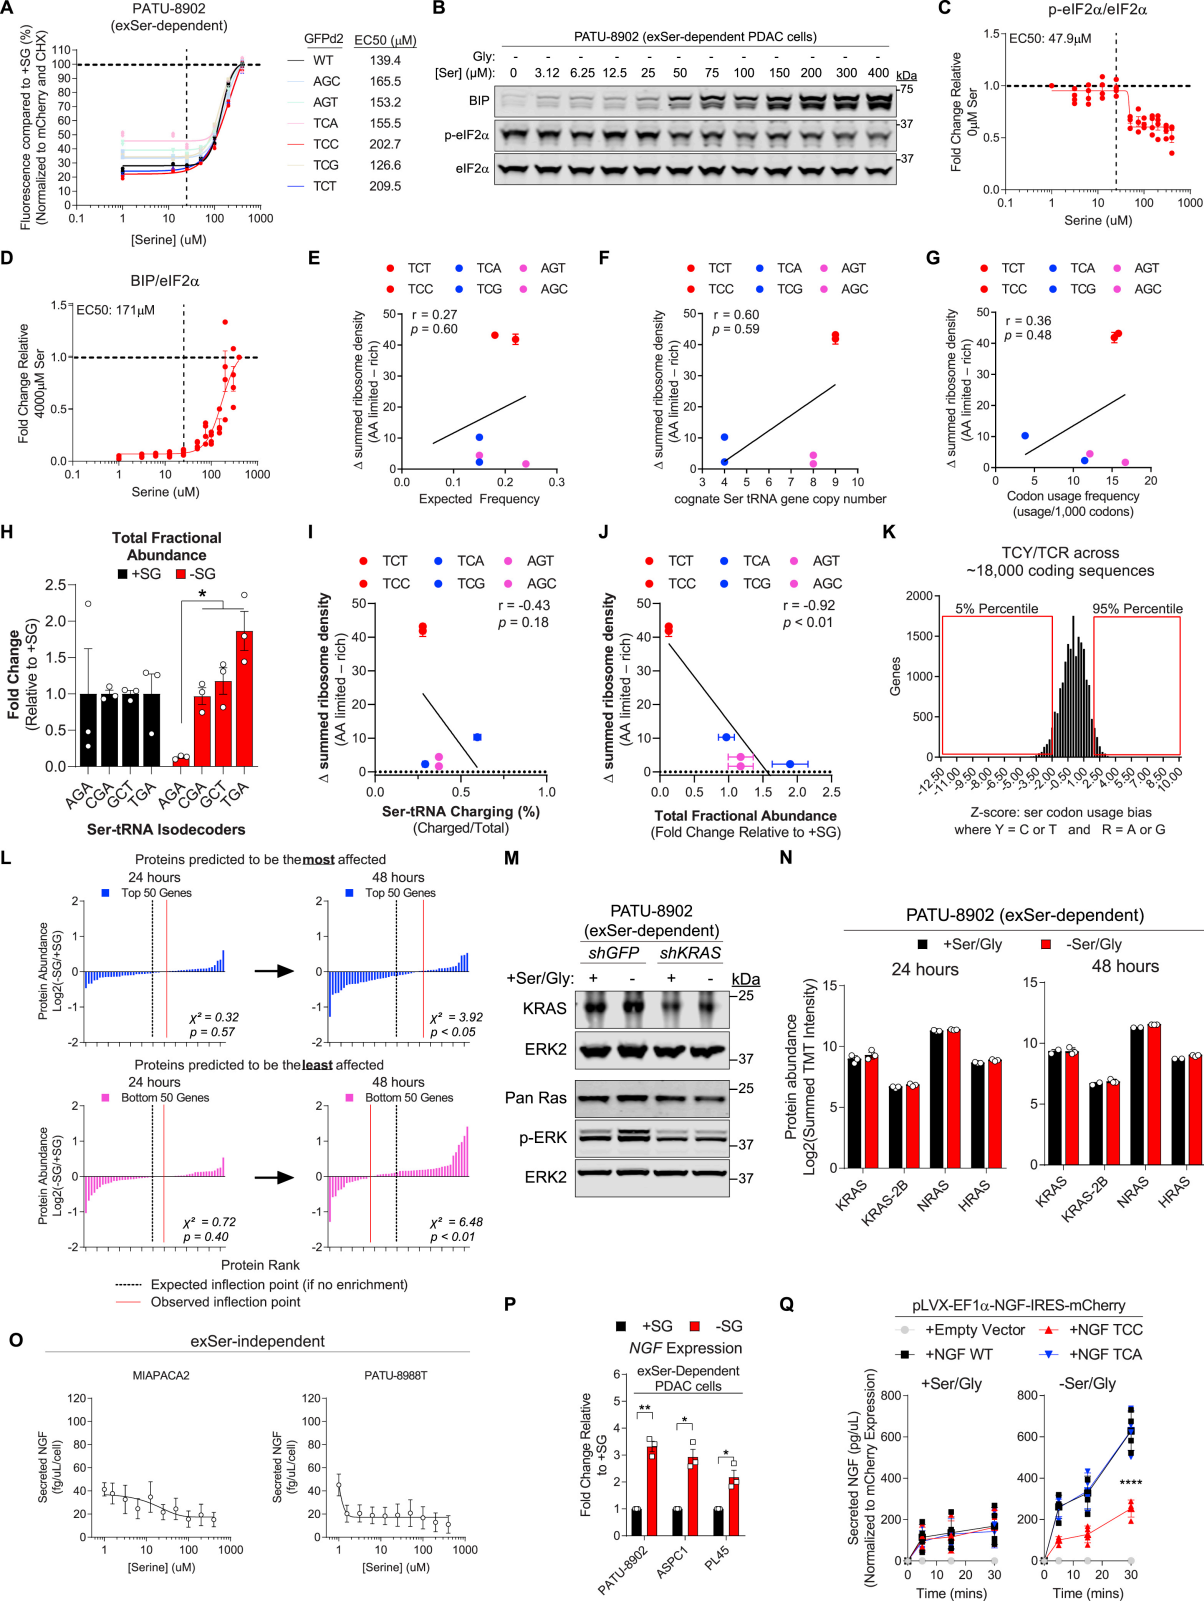

Supplement: NIHMS1636977-supplement-Supplement_figure_5.pdf [file NIHMS1636977-supplement-Supplement_figure_5.pdf]

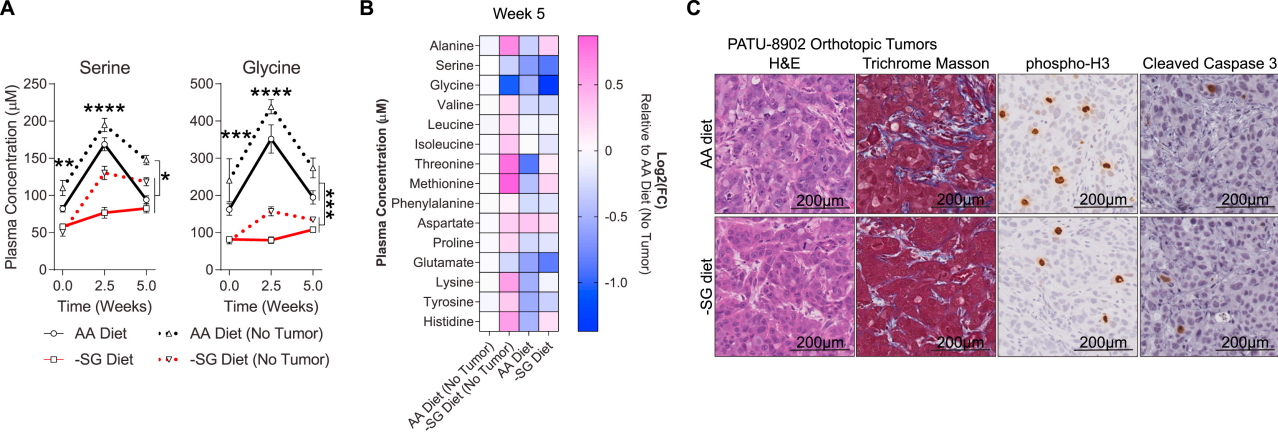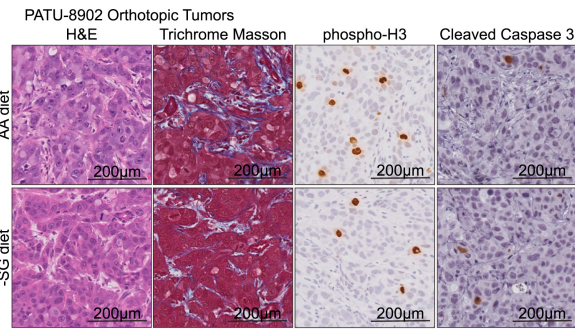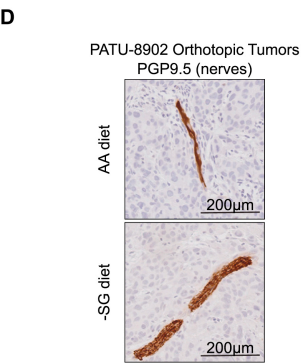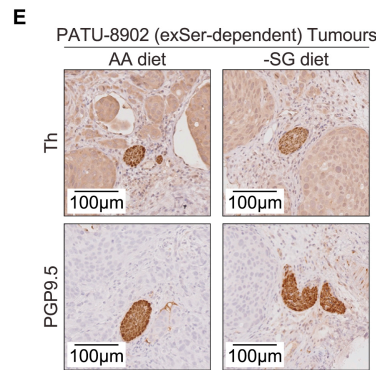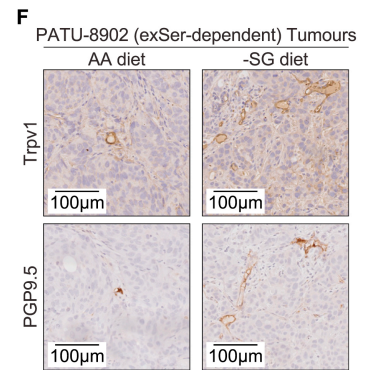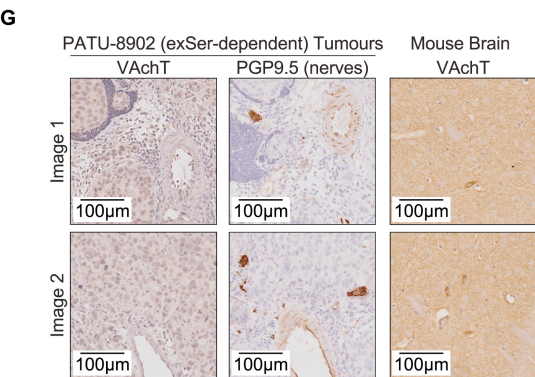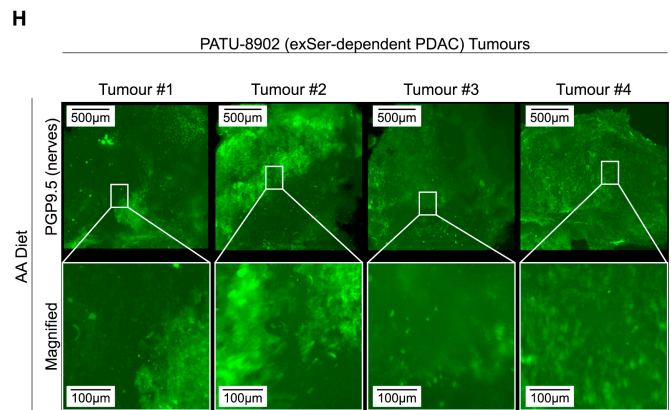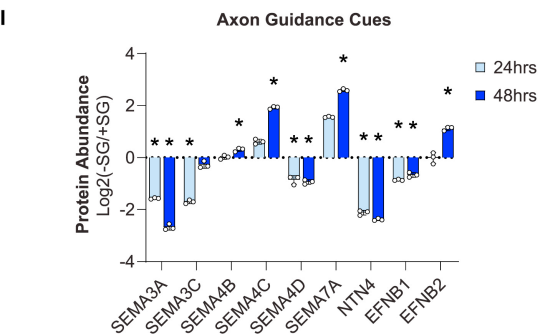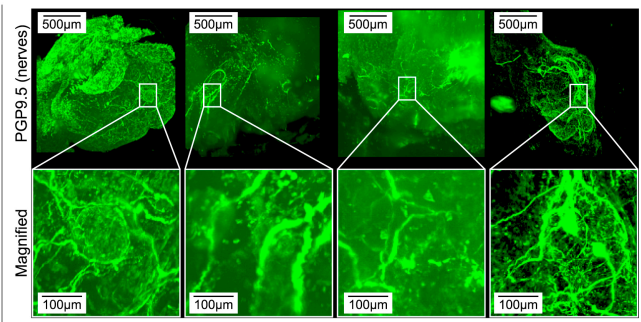

Supplement: NIHMS1636977-supplement-Supplement_figure_6.pdf [file NIHMS1636977-supplement-Supplement_figure_6.pdf]
